1 **The genome of the bee louse fly reveals deep convergences in the evolution of social**  
2 **inquilinism**

3  
4 Hélène Legout<sup>1</sup>, David Ogereau<sup>1</sup>, Julie Carcaud<sup>1</sup>, Jonathan Filée<sup>1</sup>, Lionel Garnery<sup>1</sup>, Clément  
5 Gilbert<sup>1</sup>, Fabrice Requier<sup>1</sup>, Jean-Christophe Sandoz<sup>1</sup>, Amir Yassin<sup>1</sup>, Héloïse Bastide<sup>1</sup>

6  
7 <sup>1</sup>Laboratoire Évolution, Génomes, Comportement et Écologie, CNRS, IRD, Université Paris-  
8 Saclay – Institut Diversité, Écologie et Évolution (IDEEV), 12 route 128, 91190 Gif-sur-  
9 Yvette, France.

10  
11 **Corresponding author:** Héloïse Bastide ([heloise.bastide@universite-paris-saclay.fr](mailto:heloise.bastide@universite-paris-saclay.fr))

12  
13  
14  
15

16 **Abstract**

17 The nests of social insects often harbor a rich fauna of intruders, known as inquilines.  
18 Close relatedness between the host and the inquiline prevails due to potential genetic  
19 predispositions but how phylogenetically distant inquilines adapt to their hosts remains  
20 unclear. Here, we analyzed the genome of the wingless and blind bee louse fly *Braula*  
21 *coeca*, an inquiline of the Western honey bee *Apis mellifera*. We found that unlike many  
22 parasites, such as the human louse, the bee louse genome did not show significant erosion  
23 or strict reliance on an endosymbiont, likely due to a relatively recent age of inquilinism.  
24 However, a strikingly parallel evolution in a set of gene families was observed between  
25 the honey bee and the bee louse. Convergences included genes potentially involved in  
26 metabolism and immunity, and the loss of nearly all bitter-tasting gustatory receptors in  
27 agreement with life in a protective hive and a major diet of honey, pollens, and beeswax.  
28 Vision-related and odorant receptor genes also exhibited rapid losses. Only genes whose  
29 orthologs in the closely related *Drosophila melanogaster* respond to components of the  
30 honey bee alarm pheromones or floral aroma were retained, whereas the losses included  
31 orthologous receptors responsive to the anti-ovarian honey bee queen pheromone. These  
32 results establish a new model for the study of major morphological and neuroethological  
33 transitions and indicate that deep genetic convergences between phylogenetically distant  
34 organisms can underlie the evolution of social inquilinism.

35

36 **Keywords:** parasitism; morphological evolution; behavioral adaptations; gene family  
37 evolution; *Drosophila*.

38

## 39 **Introduction**

40 Inquilinism is a form of interspecific interactions wherein an organism, the  
41 inquiline, inhabits the “home” of another organism (Hegner 1926). Examples abound in  
42 nature (Moser 1964; Luczkovich *et al.* 1991; Sanver and Hawkins 2000; Kneitel and Miller  
43 2002), and ancient cases are even present in the fossil record (Landman *et al.* 2014). The  
44 relationship between the inquiline and its host can range from commensalism to  
45 parasitism depending on the overlap in and availability of resources and space. Factors  
46 favoring the evolution of inquilinism greatly depend on the inquiline’s capacity to hide its  
47 presence from the host. This is particularly true in the case of social inquilines, which  
48 constitute the most frequent case of inquilinism. wherein the efficient nest cleaning and  
49 care for the offspring performed by social organization are often fatal for the intruders.  
50 Therefore, phylogenetic relatedness with the host was suggested to play a major role in  
51 facilitating social inquilinism, since the inquiline would share some common genetic  
52 factors promoting camouflage, known as Emery’s rule (Cini *et al.* 2019). Although recent  
53 phylogenetic studies have revised and sometimes rejected Emery’s rule at the specific  
54 level (Huang and Dornhaus 2008; Lopez-Orsorio *et al.* 2015; Romiguier *et al.* 2018; but see  
55 Savolainen and Vepsäläinen 2003; Degueldre *et al.* 2021), most cases of social inquilines  
56 remain related to the same genus (Jansen *et al.* 2010; Cardinal *et al.* 2010), tribe (Schrader  
57 *et al.* 2021), family (Ronquist 1994; Cardinal *et al.* 2010), or even order (Gilbert *et al.*  
58 2012). The genetic basis underlying inquilines belonging to distinct orders or across wide  
59 phylogenetic distances is still less understood.

60 The hive of the Western honey bee *Apis mellifera* comprises several parasites and  
61 inquilines that are attracted by the hive’s rich resources (honey, pollen, beeswax, and the  
62 bees themselves) and its clean and protective shelter (Winston 1987). These include  
63 several insects belonging to distinct orders such as wax moths, hive beetles, and  
64 endoparasitoid flies. None of these has endured as profound morphological changes that  
65 even its affiliation at the order-level was confounded, as the apterous and quasi-blind bee  
66 louse fly, *Braula coeca* (Figure 1A-C). The female lays eggs in honey (not brood) cells, and  
67 the hatched larvae eat pollen and wax, where they borrow tunnels in which they pupate  
68 without forming true puparia (Skaife 1922; Imms 1942). Following emergence, the adults  
69 attach to the body of worker bees, migrating from one individual to another until reaching  
70 the queen. There, they move to the head, stimulate regurgitation and imbibe from her  
71 mouth the honey and nectar (Skaife 1922; Imms 1942). The bee louse is considered an

72 inquiline kleptoparasite with potential negative effects on bee colony health due to  
73 galleries in bee combs and the facilitation of transmitting serious pathogenic viruses to  
74 the bees (Avalos *et al.* 2019).

75         The phylogenetic positioning within the Diptera of the family Braulidae, which  
76 contains the bee louse, has long been puzzling due to its modified morphology (Grimaldi  
77 and Underwood 1986). Interestingly, recent phylotranscriptomic and phylogenomic  
78 analyses show the bee louse to constitute a basal lineage within the Drosophilidae  
79 (Bayless *et al.* 2021; Winkler *et al.* 2022). This proximity to *Drosophila melanogaster*, the  
80 most investigated insect at the genetic, developmental, and neurobiological levels, makes  
81 the bee louse a unique model for the study of the genomic changes underlying major  
82 morphological and ecological shifts. We present here an annotated assembly of the bee  
83 louse *B. coeca* genome and compare the evolution of its genomic architecture and gene  
84 content with those of *D. melanogaster* (Adams *et al.* 2000), the honey bee *A. mellifera*  
85 (Weinstock *et al.* 2006), as well as to its homonym and morphologically-similar the  
86 ectoparasitic human louse *Pediculus humanus* (Kirkness *et al.* 2010). The comparisons  
87 revealed striking evidence of cross-order genomic parallelism and shed new light on the  
88 evolution of social inquilinism between phylogenetically distant organisms.

89

## 90 **Results**

### 91 *Genome architecture*

92 We sequenced whole genome from a pooled sample of 15 unsexed *Braula coeca*  
93 individuals, all collected from the same geographical location, the Island of Ouessant in  
94 France. We used a hybrid approach to assemble a draft genome using both long-read  
95 Oxford Nanopore Technology (ONT) and short-read Illumina sequencing (see Methods).  
96 **Size.** The final assembly of the bee louse showed a size of 309 Mb, an N50 of 347227 bp  
97 and a GC content of 34.95%. BUSCO gave a score of 95.8% of the Dipteran conserved  
98 single-copy orthologs with 1.3% of duplicated genes. Analysis of heterozygous k-mers  
99 pairs distribution indicated that the genome is diploid (Supplementary Figure 1A) and  
100 genome size prediction using k-mers distribution spectra predict a genome size of 308  
101 Mb, concordant with the assembly size (Supplementary Figure 1B). The bee louse genome  
102 is therefore larger than the genomes of the honey bee (227 Mb), *Drosophila melanogaster*  
103 (143 Mb), and the ectoparasitic human louse (108 Mb).

104 **Endosymbionts.** The taxonomic assignment of each contigs show that most of them  
105 (96%) match with arthropods indicating no (or very few) DNA contamination  
106 (Supplementary Figure 1C,D). Unlike in the human louse, no evidence for an obligate  
107 endosymbiont was detected in the bee louse. Imms (1942) discussed the possibility that  
108 the bee louse larvae have gut microbes that facilitate the digestion of the beeswax. We  
109 cannot rule out this hypothesis, but our results show that such microbiota, if present,  
110 likely do not persist in the adult stage.

111 **Gene content.** The annotation of the bee louse genome yielded 11,221 protein-coding  
112 genes. This number is higher than in *A. mellifera* and *P. humanus* where 9,935 and 10,773  
113 protein-coding genes are found, respectively, but lower than that of *D. melanogaster*  
114 (13,968 protein-coding genes). The Annotation Edit Distance (AED), which measures the  
115 congruence between gene annotation and its supporting evidence was  $\leq 0.5$  for 96.7% of  
116 our gene models, indicating the near completeness of our annotation. Similarly, 79.79%  
117 of the corresponding proteins had a Pfam domain, which is another indication of  
118 annotation completeness since it varies between 57% and 75% in most eukaryotes.

119 **Synteny.** Orthologous genes were used to map *B. coeca* scaffolds to their corresponding  
120 Muller's elements in *D. melanogaster*. The alignment showed strong consistency  
121 indicating persistent synteny between the two lineages (Figure 1D). However, given the  
122 short length of the scaffolds it was difficult to assess how much collinearity and  
123 rearrangement events took place since their divergence. There is no karyotypic map of *B.*  
124 *coeca* so it remains difficult at this stage to infer the chromosomal number from the  
125 assembly alone.

126 **Mitochondrial genome.** The mitochondrial genome consisted of a single scaffold of 19  
127 kb (Figure 1E) unlike in the human louse, which has multiple fragments inside the  
128 mitochondria. Compared to conserved gene content and collinearity of the *D.*  
129 *melanogaster* and *A. mellifera* mitogenomes (Crozier and Crozier 1993), the  
130 mitochondrial gene content of the bee louse was incomplete, lacking the *ND1* gene,  
131 included several duplications of the *ND2* and *ND4L* genes that are truncated and/or  
132 display frameshifts and had a rearrangement between the *COX1* and *COX2* genes. The  
133 nuclear genomes contained 165 mitochondrial DNA insertions (NUMTs) distributed on  
134 88 contigs and totalizing 278 kb ( $\sim 0.09\%$  of the genome). The proportion of NUMTs in  
135 the bee louse approaches that of the honey bee (0.08%, (Behura 2007)) but exceeds that  
136 of the genus *Drosophila* (0.03%, (Rogers and Griffiths-Jones 2012)).

137 **Transposable elements.** The large genome size of the bee louse despite its low gene  
138 content compared to *D. melanogaster* suggest an increase in repetitive sequences.  
139 RepeatModeler and RepeatMasker analyses indicated that nearly 41.41% of the *B. coeca*  
140 genome consist of such sequences, compared to 22.15% and 11.14% in *D. melanogaster*  
141 and *A. mellifera*, respectively (Supplementary Table 1). There is a far larger proportion of  
142 long interspersed nuclear elements (LINEs) retrotransposons in *B. coeca* (15.18%)  
143 compared to only 2.38% and none in *D. melanogaster* and *A. mellifera*, respectively. Long  
144 terminal repeat (LTR) elements on the other hand were fewer in *B. coeca* (0.57%) and *A.*  
145 *mellifera* (0.17%) than in *D. melanogaster* (6.99%).

146 Because host-parasite relationships have repeatedly be invoked as a factor that  
147 may favor horizontal transfer of transposable elements (TE) (Gilbert *et al.* 2010; Ortiz *et*  
148 *al.* 2015; Venner *et al.* 2017), we searched for evidence of such transfers between *B. coeca*  
149 and *A. mellifera* (Supplementary Text 1). We found one TE, *Famar1-like* element,  
150 previously described in the earwig *Forficula auricularia* (Barry *et al.* 2004a) that shows  
151 high similarity between *B. coeca* and *A. mellifera* but was absent in *D. melanogaster*, highly  
152 suggestive of acquisition through horizontal transfer (Supplementary Figure 2). However,  
153 phylogenetic analysis of multiple copies of this TE extracted from 37 widely divergent  
154 animal species (Supplementary Figure 3) shows that it was most likely acquired through  
155 independent transfer events in *B. coeca* and *A. mellifera*, and that the tight ecological  
156 connection between the two species are unlikely to have played a direct role in these  
157 transfers (Supplementary Text 1).

158

### 159 *Gene family evolution*

160 **Families with excess losses.** We identified gene families that underwent reduction or  
161 extension as compared to *D. melanogaster* using DAVID (Sherman *et al.* 2022).  
162 Underrepresented families (27 families with False Discovery Rate (FDR) < 0.05) showed  
163 a striking parallelism with the honey bee, with three of the most underrepresented  
164 families being similar (given in Honey bee Genome Sequencing Consortium 2006;  
165 Supplementary Table 2). These included InterPro-defined families such as Peptidase S1  
166 (IPR001254), Ecdysteroid kinase-like (IPR004119) and Zinc finger AD-type (IPR012934).

167 Peptidases play a major role in detoxification and digestion of protein-rich diets.  
168 Their reduction in both the honey bee and the bee louse could be due to the  
169 overprotectiveness of their mutual habitat, the hive, and/or the low protein content of

170 their food, nectar and honey. The Ecdysteroid kinase-like (EcKL) family is also suspected  
171 to include proteins involved in detoxification (Scanlan *et al.* 2020). We also noted a  
172 functional affinity between two underrepresented families involved in the formation of  
173 the exoskeleton: the Insect cuticle protein (IPR000618) in the honey bee and Chitin-  
174 binding domain (IPR002557) in the bee louse. Cuticles could act as barriers against  
175 environmental toxins, which may not be highly encountered in the hive. Remarkably, *B.*  
176 *coeca* is unique among Cyclorrhaphan Diptera as its pupa, similarly to the honey bee's  
177 (Winston 1987), is contained in the unmodified cuticle of the third instar larva, and no  
178 sclerotized puparium is formed (Skaife 1922; Imms 1942).

179 Significant biological processes terms (FDR < 0.05) were mostly related to  
180 proteolysis and lipid metabolism (e.g., fatty-acyl-co-A biosynthesis), whereas cellular  
181 components terms were associated with the membranes and extracellular space in  
182 agreement with a biased loss of genes potentially involved with metabolism,  
183 detoxification and/or immunity (Supplementary Table 2).

184 **Families with excess gains.** We did not find a similar important overlap in  
185 overrepresented gene families between the bee louse and the honey bee (5 families with  
186 FDR < 0.05; Supplementary Table 3). Expanding gene families unique to the honey bee  
187 included 7TM odorant receptor (IPR004117), Ankyrin (IPR002110), Yellow/royal jelly  
188 protein (IPR003534) and LysR substrate-binding (IPR005119) (Weinstock *et al.* 2006).  
189 We found one family, Pleckstrin homology domain (IPR001849), that was  
190 overrepresented in both species. This domain is a part of several lipases that are known  
191 to be involved in wax ingestion. Indeed, larvae of the bee louse mine the beeswax (Imms  
192 1942), whereas honey bee workers use their salivary lipases while chewing the wax to  
193 form the hive combs (Kurstjens *et al.* 1985).

194 Gene Ontology (GO) biological and cellular terms with significant enrichment at  
195 FDR < 0.05 associated with morphological (e.g., imaginal disc-derived leg morphogenesis,  
196 autophagy, and dorsal closure) and/or neurological (e.g., dendrite morphogenesis, axon  
197 guidance, sensory perception of sound, and neuromuscular junction) developments  
198 (Supplementary Table S3). The bee louse duplicated genes hence may play a role in the  
199 evolution of the particular morphologies that helped adaptation to the phoretic lifestyle.

200 **Vision.** The species Latin name refers to the early assumption that the bee louse was blind  
201 due to the reduction of the eye size and the loss of the ocelli. However, thin optic nerves  
202 connect the brain to the rudimentary eyes, which lack ommatidia and pigments



203 (Müggenburg 1892), and the bee louse demonstrates negative phototaxis, indicating a  
204 certain degree of light perception (Kaschef 1959). In agreement with reduced vision in  
205 the bee louse, we found three out of the seven rhodopsin genes, which are responsible for  
206 colored vision and the positive phototaxis of *D. melanogaster*. Two of the three genes, *Rh1*  
207 and *Rh6*, are expressed in the ommatidia and are sensitive to light with long wavelengths  
208 (Senthilan and Helfrich-Förster 2016), whereas the third one, *Rh7*, is expressed in the  
209 brain and regulates light-dependent circadian entrainment (Ni *et al.* 2017). The role of  
210 these opsins in light detection despite the absence of ommatidia is unclear. Remarkably,  
211 *Rh1*, *Rh6* and *Rh7* are structurally required in mechanosensory bristles to control larval  
212 locomotion (Zanini *et al.* 2018), and *Rh1* and *Rh6* also detect temperature (Leung and  
213 Montell 2017), whereas *Rh1* and *Rh7* detect low concentrations of a bitter plant  
214 component (Leung *et al.* 2020). Therefore, the retention of these rhodopsins in the bee  
215 louse could mainly be due to their unconventional functions. On the other hand, the red-  
216 sensitive rhodopsin *Rh2*, which is exclusively expressed in the ocelli and used for horizon  
217 detection in *D. melanogaster* (Mishra *et al.* 2021), is among those which were lost in the  
218 bee louse, in agreement with the loss of the ocelli in the bee louse.

219 **Olfaction.** Odorant receptors (ORs) are essential to detect volatile chemical signals from  
220 the environment. In most *Drosophila* species, there are nearly 61 ORs, whereas in the  
221 honey bee this family has expanded to reach 160 (Robertson and Wanner 2006). We  
222 found 29 ORs in the bee louse in addition to the Orco ortholog. Of these four had no direct  
223 orthologs in *D. melanogaster*, but the remaining 25 genes were orthologous to 21 genes  
224 in *D. melanogaster* and 12 were duplicates specific to the bee louse lineage (Figure 2A;  
225 Supplementary Figure 3). Judging from the response of those ORs to different volatiles in  
226 *D. melanogaster* as curated in the DOOR database (Münch and Galizia 2016) and assuming  
227 potential conservation of function, we can divide the bee louse ORs into three categories.  
228 First, 11 ORs respond to different components of the honey bee workers alarm and  
229 mandibular gland pheromones, e.g., 2-heptanol, propyl acetate, 2-heptanone, 1-hexanol,  
230 butyl acetate, isopentyl acetate, etc. These included *Or13a* (x2 paralogues), *Or42a*,  
231 *Or42b/Or59b*, *Or43a*, *Or47b*, *Or49a/Or85f*, *Or67b* (x4), *Or74a*, *Or85b/Or85c*, and *Or85e*  
232 (x2). Second, 12 ORs respond to different floral, pollen and nectar aromas, such as  
233 acetophenones, ethylguaiacol, geranyl acetate or fenchone, but most importantly to  
234 benzaldehyde, a major volatile of honey (Machado *et al.* 2020; Starowicz *et al.* 2021).  
235 These included *Or30a*, *Or45b* (x2), *Or59a*, *Or67b* (x4), *Or82a*, *Or85e* (x2) and *Or94a*. Note



236 that the multiple *B. coeca* paralogs orthologous to *D. melanogaster Or67b* and *Or85e* genes  
237 belong to both categories. Third, one OR, *Or67d*, which is involved in sexual pheromone  
238 11-cis-vaccenyl acetate perception (Ha and Smith 2006), is present in the bee louse. Three  
239 among the ORs that were lost in the bee louse compared to other drosophilids, *Or49b*,  
240 *Or56a* and *Or98a*, are responsible to *D. melanogaster* response to the anti-ovarian honey  
241 bee queen mandibular pheromones 9-oxo-2-decenoic acid (9ODA) and 10-hydroxy-2-  
242 decenoic acid (10HDA) (Galang *et al.* 2019). Their loss most likely protected the capacity  
243 of the bee louse to reproduce in the hive.

244 **Taste.** Gustatory receptors (GRs) allow detecting soluble chemical signals. There are  
245 nearly 68 GRs in *D. melanogaster*, that respond mostly to sweet, bitter and carbon dioxide  
246 (CO<sub>2</sub>) tastes (Weiss *et al.* 2011). Unlike their expanded OR family, the honey bee has only  
247 10 GRs, of which 7 are orthologous to sweet *Drosophila* GRs (Robertson and Wanner  
248 2006). This is likely due to the bees' food reliance on sweet floral nectars and honey. We  
249 found 13 GRs in the bee louse, with no duplications (Figure 2B; Supplementary Figure 4).  
250 These GRs could be classified according to their *D. melanogaster* orthology into three  
251 categories. First, 6 GRs belong to the sweet class, namely *Gr43a*, *Gr61a* and *Gr64a,b,e,f*  
252 which usually respond to sucrose, maltose and fructose and other major honey sugars.  
253 Second, 5 GRs belong to the bitter class, namely *Gr33a*, *Gr57a*, *Gr66a*, *Gr93a* and *Gr94a*,  
254 suggesting that nearly 50 mostly bitter tasting drosophilid GRs were lost in the bee louse.  
255 Note that in *D. melanogaster*, *Gr33a* and *Gr66a*, are potentially involved in sexual  
256 pheromones detection (Lacaille *et al.* 2007; Moon *et al.* 2009). Third, 2 GRs, *Gr21a* and  
257 *Gr63a*, which detects CO<sub>2</sub> odor in *D. melanogaster* (Jones *et al.* 2007) are present in the  
258 bee louse. Those GRs are absent in the honey bee despite its ability to perceive CO<sub>2</sub> (Stange  
259 and Diesendorf 1973). High CO<sub>2</sub> concentrations are probably characteristic of largely  
260 populated hives and induce fanning response in bees (Seeley 1974). The quasi-blind bee  
261 louse may therefore use CO<sub>2</sub> concentrations to detect the bees in the dark hive  
262 environment.

263

## 264 **Discussion**

265 That the enigmatic bee louse is indeed a drosophilid (Winkler *et al.* 2022), a lineage  
266 within the most investigated insect family with more than 100 fully sequenced genomes  
267 (Kim *et al.* 2021), is undoubtedly one of the most exciting discoveries in Dipteran  
268 phylogeny. How could a fly with a typical drosophilid genome become partly ecologically

269 like a bee and partly morphologically like a louse? Our cross-order comparisons of the bee  
270 louse to its homonyms shed significant light on the genomic basis of these spectacular  
271 convergences.

272         The genome of the human louse is among the smallest sequenced insect genomes  
273 (Kelley *et al.* 2014). Loss of significant portions of genomic and gene contents is a  
274 characteristic of obligate parasites specializing on specific hosts or inhabiting extreme  
275 environments. Indeed, the gene content of the bee louse genome approached that of the  
276 human louse, but the ~309 Mb-long genome of the bee louse is longer than that of most  
277 drosophilid species, even being slightly longer from the largest genome in this family  
278 (~304 Mb-long; Kim *et al.* 2021). Besides, the human louse has an obligatory bacterial  
279 endosymbiont that may compensate the loss of its genes (Kirkness *et al.* 2010) but no  
280 evidence for such associations is present in the bee louse. These differences may mainly  
281 indicate the relative recency of the shift to inquilinism in the bee louse compared to the  
282 230 million years (myr) of specialization in true lice (Misof *et al.* 2014). *Megabroula*, the  
283 closest relative to the genus *Broula*, is an inquiline of the giant honey bee *Apis laboriosa*,  
284 whose divergence from the Western honey bee *A. mellifera* is around 23 myr ago  
285 (Grimaldi and Underwood 1986; Cardinal *et al.* 2010). The crown age of the Drosophilidae  
286 and the divergence time between *Apis* and its closest pollen-basket (corbiculate) bees are  
287 estimated at 66-70 myr ago (Cardinal *et al.* 2010; Suvorov *et al.* 2021). This indicates that  
288 association between braulids and *Apis* has arisen between 70 to 20 myr ago.

289         The origin of social inquilinism requires the evolution of multiple convergences  
290 that can locate the host, deceive it to enter the colony, adapt to its social organization, and  
291 remain undetected or not easily removed from the colony. These phenotypes, which are  
292 often host-specific, evolve more easily when the inquiline and the host are  
293 phylogenetically close (Cini *et al.* 2019). Despite the distance of the bee louse from honey  
294 bees, gene family analysis provided strong evidence for convergent evolution mostly for  
295 genes potentially involved in immunity, detoxification, metabolism and chemical  
296 perception. Although *Broula* has lost nearly half of the typical drosophilids odorant  
297 receptor repertoire, in contrast to the major expansion of this family in the honey bee, it  
298 predominantly retained genes whose orthologs in *D. melanogaster* detect compounds of  
299 the honey bee pheromones and/or floral aroma and honey odors. Low concentrations of  
300 isopentyl acetate (IPA), the major component of the alarm pheromone, released by  
301 unstressed workers at hive entries attract the parasitic hive beetle *Aethina tumida* (Torto

302 *et al.* 2007), suggesting that the detection of the host odors could be a common strategy  
303 among phylogenetically distant socialinquilines and parasites. We also noted that the bee  
304 louse has multiple copies related to *Or67b* which responds to several components of bee  
305 alarm pheromones, such as 1-hexanol, 2-heptanone, 1-butanol and 3-methyl-1-butanol,  
306 as well as to benzaldehyde, the major honey volatile, in *D. melanogaster* (Münch and  
307 Galizia 2016), suggesting a possible dual ancestral function that might have facilitated  
308 association with the honey bees. The multiple copies related to *Or67b* are remarkable  
309 since the copy number expansion of this gene was associated with the evolution of  
310 herbivory and strong plant-association in the drosophilid genus *Scaptomyza* (Goldman-  
311 Huertas *et al.* 2015; Matsunaga *et al.* 2022). Therefore, the bee louse might have evolved  
312 from a flower-breeding or plant-associated lineage within the Drosophilidae, a lifestyle  
313 that has recurrently evolved in this family (Yassin 2013).

314         Whereas major molecular convergences could exist between the inquiline and its  
315 social host, divergent strategies to adapt to the eusocial lifestyle requirements are still  
316 needed. The loss of the three odorant receptors, *Or56a*, *Or49b* and *Or98a*, that respond in  
317 *D. melanogaster* to the honey bee queen's pheromones which "sterilize" the bee workers,  
318 mainly 9-oxo-2-decenoic acid (9ODA) and possibly 9-hydroxy-2-decenoic acid (9HDA)  
319 (Galang *et al.* 2019), is a notable example. The queen's pheromones elicit anti-ovarian  
320 response in other insects including *D. melanogaster* mostly through the activation of the  
321 neurons bearing these receptors. Therefore, a *sine qua non* condition for reproducing in a  
322 beehive is to protect against the effects of those pheromones, with the loss of the  
323 responding receptors being a preliminary and effective strategy. However, this raises the  
324 question of how the bee lice recognize the queen, which they preferentially infest (Imms  
325 1942). It is therefore possible that higher sensitivity to worker pheromones, as suggested  
326 by the repertoire of retained odorant receptors (see above), may help to mostly  
327 discriminate the workers hence facilitating the recognition of the queen, who has a  
328 rudimentary sting gland. Another possibility is that strong CO<sub>2</sub> emission by the court  
329 surrounding the queen may be an indicator of her location, as could be suggested from  
330 the retention of the two CO<sub>2</sub>-smelling gustatory receptors, *Gr21a* and *Gr63a*, whose  
331 orthologs are absent in the honey bee. It also remains unclear how the bee lice sexually  
332 communicate in the hive given the predominance of chemical camouflage; the  
333 hydrocarbon profile of bee lice from different colonies mimicked that of the colony of  
334 origin (Martin and Bayfield 2014). The retention of some chemosensory genes whose

335 orthologs are involved in sexual pheromone detection in *D. melanogaster*, such as *Or67d*,  
336 *Gr33a* and *Gr66a* (Kurtovic *et al.* 2007; Lacaille *et al.* 2007; Moon *et al.* 2009) suggest that  
337 pheromonal communications may still be present in the bee louse but perhaps at low  
338 undetectable levels.

339 Small size, loss of wings and the evolution of strongly clinging legs are all  
340 morphological adaptations that could prevent the honey bees getting rid of the bee lice.  
341 All these adaptations are convergent with ectoparasitic true lice, and for some, such as  
342 apterism, represent major recurrent changes that have responded to distinct pressures  
343 throughout the history of insects (Roff 1990). We found intact most of the main wing  
344 development genes whose mutations severely reduce the wing in *D. melanogaster*, such  
345 as *wingless*, *apterous* or *vestigial*. This means that the major morphological changes more  
346 likely resulted from regulatory changes of these core genes or modifications of other  
347 genes. The regression of visual systems and their underlying genes in the bee louse  
348 spending most of its life cycle in the bee hives is a common phenomenon in animals  
349 inhabiting dark environments, such as fossorial mammals (Partha *et al.* 2017) and  
350 cavefishes (Policarpo *et al.* 2021). With its genetic relatedness to *Drosophila* and  
351 ecological association to *Apis*, two major laboratory models, and with new genomic tools  
352 presented here, the bee louse *Braula coeca* is a promising model to address questions  
353 related to deep convergences that are still difficult to approach in multiple highly  
354 specializing animals.

355

## 356 **Materials and Methods**

### 357 *Sample collection and genomic library preparation*

358 Samples of *Braula coeca* were collected from honey bee colonies on the Island of Ouessant  
359 in France and kindly provided to us by the *Association Conservatoire de l'Abeille Noire*  
360 *Bretonne* (A.C.A.N.B.). Genomic DNA was extracted from 15 unsexed individuals  
361 conserved in alcohol, using the Nucleobond AXG20 kit and buffer set IV from Macherey-  
362 Nagel (ref. 740544 and 740604, <https://www.mn-net.com>, Düren, Germany).

363

### 364 *Genome sequencing and assembly*

365 We used a hybrid approach to assemble a draft genome of *B. coeca* using both long-  
366 read Oxford Nanopore Technology (ONT) and short-read Illumina sequencing, as in Miller  
367 *et al.* (2019). Before nanopore sequencing, a size selection was conducted on the DNA

368 using the SRE XS from Circulomics (<https://www.circulomics.com/>, Baltimore, Maryland,  
369 USA). The SQK-LSK110 kit from Oxford Nanopore Technology (Lu *et al.* 2016;  
370 <https://nanoporetech.com/>) was then used to prepare the samples for nanopore  
371 sequencing following manufacturer's protocol. The library was loaded and sequenced on  
372 a R9.4.1 flow cell (ref FLO-Min106) for sequencing. Raw data were basecalled using  
373 Guppy v5.0.11 and the "sup" algorithm. Illumina paired-end sequencing was performed  
374 by Novogene Company Limited (<https://en.novogene.com>, Cambridge, UK) on the same  
375 DNA library.

376 We used MaSuRCA v4.0.3 (Zimin *et al.* 2017) to produce the hybrid assembly of  
377 our genome, using the Cabog assembler. We obtained a final assembly size of 309,35Mb  
378 in 2477 contigs, with a N50 of 347211 pb. The completeness of the assembly was  
379 estimated to 95,8% with Busco v5.0 on the *diptera\_odb10* dataset  
380 (C:95.8%[S:94.6%,D:1.2%],F:0.7%,M:3.5%,n:3285 ).

381

#### 382 *Estimation of genome size, endosymbionts detection and mitogenome assembly*

383 K-mers frequencies within short-read data were obtained with KMC 3 (Kokot *et al.*  
384 2017). Genome size and ploidy were inferred using GenomeScope v2.0 with k-mer size =  
385 21 and Smudgeplot (Ranallo-Benavidez *et al.* 2020). Contig taxonomy was performed  
386 using Blobtools (Laetsch and Blaxter 2017) with Diamond as search engine (Buchfink *et*  
387 *al.* 2015) against the UniProt database using a local copy of the NCBI TaxID file for the  
388 taxonomic assignation of the best hit. Minimap2 (Li 2018) was used for read mapping.

389

#### 390 *Genome annotation*

391 The *B. coeca* genome was annotated using Maker v2.31.10 (Cantarel *et al.* 2008),  
392 following the protocol given in Muller *et al.* (2021), wherein multiple rounds of Maker  
393 supported by the training of the SNAP v.2006-07-28 (Korf 2004) and Augustus v.3.3.3  
394 (König *et al.* 2016) gene finding and prediction tools, were conducted. Transcriptome of  
395 *B. coeca* (NCBI accession no. SRR2046564; 1KITE Consortium; (Bayless *et al.* 2021)) and  
396 proteomes of five *Drosophila* species, namely *D. innubila* (Hill *et al.* 2019), *D. albomicans*  
397 (Mai *et al.* 2020), *D. bipectinata* (Kim *et al.* 2021), *D. melanogaster* (Adams *et al.* 2000) and  
398 *D. virilis* (Clark *et al.* 2007) were used to guide the annotation. Protein-Protein BLAST  
399 2.9.0+ (Altschul *et al.* 1997) (-evalue 1e-6 -max\_hsps 1 -max\_target\_seqs 1) was then used  
400 to assess putative protein functions in *B. coeca* by comparing the protein sequences given

401 by Maker to the protein sequences from the annotated genome of *D. melanogaster*. The  
402 colocalization of *B. coeca* and their *D. melanogaster* orthologs on their respective contigs  
403 and chromosomal arms was analyzed to test for synteny.

404

#### 405 *Transposable elements annotation and transfer*

406 Transposable elements were identified in each species following a two-step  
407 protocol. First, we used RepeatModeler v 2.0.1 (Flynn *et al.* 2020) with default parameters  
408 to generate a *de novo* library of repetitive regions. RepeatMasker v 4.0.9 (Flynn *et al.*  
409 2020) was then run with the newly generated library and the options -a (create a .align  
410 output file) and -s (slow search; more sensitive) to create a summary of the families of  
411 transposable elements found in each reference genome along with the percentage of the  
412 genome they represent. Horizontal transfer analyses protocols of the *Famar1*-like  
413 element are given in Supplementary Text 1.

414

#### 415 *Gene family evolution*

416 The Database for Annotation, Visualization and Integrated Discovery DAVID 2021  
417 (Sherman *et al.* 2022) was used to test for gene ontology (GO) terms enrichments among  
418 lists of *D. melanogaster* orthologs annotated on the *B. coeca* genome (see above). The  
419 program was either fed with the list of *D. melanogaster* genes that were absent or  
420 duplicated in the *B. coeca* genome to test for under- and overrepresented gene families,  
421 respectively, compared to *D. melanogaster* genome, as denoted by the False Discovery  
422 Rate (FDR) correction for multiple tests. Each analysis was conducted for biological  
423 processes, molecular function, and cytological components.

424

#### 425 *Chemosensory superfamilies evolution*

426 Protein sequences of the odorant (ORs) and gustatory (GRs) receptors of *A.*  
427 *mellifera* and *D. melanogaster* were obtained from Robertson and Wanner (2006) to  
428 which we added the annotated ORs and GRs protein sequences of *B. coeca*. Sequences  
429 were aligned using Molecular Evolutionary Genetic Analysis (MEGA X) software package  
430 (Kumar *et al.* 2018), which was also used to infer a maximum-likelihood phylogenetic tree  
431 for each family. We used iTOL v4 (Letunic and Bork 2019) to visualize the trees. *B. coeca*  
432 protein sequences are given in Supplementary Datasets 2 and 3 for ORs and GRs,  
433 respectively.



434

## 435 **Acknowledgments**

436 We are very grateful to Dr. Frédéric Marion-Poll for insightful comments on an early draft  
437 of the manuscript and to the *Association Conservatoire de l'Abeille Noire Bretonne*  
438 (A.C.A.N.B.) for help collecting *B. coeca* flies. *Braula* genome sequencing was funded by a  
439 grant from Université Paris Saclay (ADAPAR) to HB.

440

## 441 **Conflicts of interest**

442 The authors declare no conflicts of interest.

443

## 444 **References**

445 Adams M. D., S. E. Celniker, R. A. Holt, C. A. Evans, J. D. Gocayne, *et al.*, 2000 The Genome  
446 Sequence of *Drosophila melanogaster*. *Science* 287: 2185–2195.  
447 <https://doi.org/10.1126/science.287.5461.2185>

448 Altschul S. F., T. L. Madden, A. A. Schäffer, J. Zhang, Z. Zhang, *et al.*, 1997 Gapped BLAST  
449 and PSI-BLAST: a new generation of protein database search programs. *Nucl Acids Res* 25:  
450 3389–3402. <https://doi.org/10.1093/nar/25.17.3389>

451 Avalos J., H. Rosero, G. Maldonado, and F. J. Reynaldi, 2019 Honey bee louse (*Braula*  
452 *schmitzi*) as a honey bee virus vector? *Journal of Apicultural Research* 58: 427–429.  
453 <https://doi.org/10.1080/00218839.2019.1565726>

454 Barry E. G., D. J. Witherspoon, and D. J. Lampe, 2004a A Bacterial Genetic Screen Identifies  
455 Functional Coding Sequences of the Insect *mariner* Transposable Element *Famar1* Amplified  
456 From the Genome of the Earwig, *Forficula auricularia*. *Genetics* 166: 823–833.  
457 <https://doi.org/10.1534/genetics.166.2.823>

458 Barry E. G., D. J. Witherspoon, and D. J. Lampe, 2004b A Bacterial Genetic Screen Identifies  
459 Functional Coding Sequences of the Insect *mariner* Transposable Element *Famar1* Amplified  
460 From the Genome of the Earwig, *Forficula auricularia*. *Genetics* 166: 823–833.  
461 <https://doi.org/10.1093/genetics/166.2.823>

462 Bayless K. M., M. D. Trautwein, K. Meusemann, S. Shin, M. Petersen, *et al.*, 2021 Beyond  
463 *Drosophila*: resolving the rapid radiation of schizophoran flies with phylotranscriptomics. *BMC*  
464 *Biol* 19: 23. <https://doi.org/10.1186/s12915-020-00944-8>

465 Behura S. K., 2007 Analysis of Nuclear Copies of Mitochondrial Sequences in Honeybee (*Apis*  
466 *mellifera*) Genome. *Molecular Biology and Evolution* 24: 1492–1505.



- 467 <https://doi.org/10.1093/molbev/msm068>
- 468 Buchfink B., C. Xie, and D. H. Huson, 2015 Fast and sensitive protein alignment using  
469 DIAMOND. *Nat Methods* 12: 59–60. <https://doi.org/10.1038/nmeth.3176>
- 470 Cantarel B. L., I. Korf, S. M. C. Robb, G. Parra, E. Ross, *et al.*, 2008 MAKER: An easy-to-use  
471 annotation pipeline designed for emerging model organism genomes. *Genome Res.* 18: 188–  
472 196. <https://doi.org/10.1101/gr.6743907>
- 473 Cardinal S., J. Straka, and B. N. Danforth, 2010 Comprehensive phylogeny of apid bees reveals  
474 the evolutionary origins and antiquity of cleptoparasitism. *Proceedings of the National*  
475 *Academy of Sciences* 107: 16207–16211. <https://doi.org/10.1073/pnas.1006299107>
- 476 Cini A., S. Sumner, and R. Cervo, 2019 Inquiline social parasites as tools to unlock the secrets  
477 of insect sociality. *Philosophical Transactions of the Royal Society B: Biological Sciences* 374:  
478 20180193. <https://doi.org/10.1098/rstb.2018.0193>
- 479 Clark A. G., M. B. Eisen, D. R. Smith, C. M. Bergman, B. Oliver, *et al.*, 2007 Evolution of  
480 genes and genomes on the *Drosophila* phylogeny. *Nature* 450: 203–218.  
481 <https://doi.org/10.1038/nature06341>
- 482 Crozier R. H., and Y. C. Crozier, 1993 The mitochondrial genome of the honeybee *Apis*  
483 *mellifera*: complete sequence and genome organization. *Genetics* 133: 97–117.  
484 <https://doi.org/10.1093/genetics/133.1.97>
- 485 Degueldre F., P. Mardulyn, A. Kuhn, A. Pinel, C. Karaman, *et al.*, 2021 Evolutionary history  
486 of inquiline social parasitism in *Plagiolepis* ants. *Molecular Phylogenetics and Evolution* 155:  
487 107016. <https://doi.org/10.1016/j.ympev.2020.107016>
- 488 Emery C., 1909 Über den Ursprung der dulotischen, parasitischen und myrmekophilen  
489 Ameisen. *Biologisches Centralblatt* 29: 352–362.
- 490 Flynn J. M., R. Hubley, C. Goubert, J. Rosen, A. G. Clark, *et al.*, 2020 RepeatModeler2 for  
491 automated genomic discovery of transposable element families. *Proceedings of the National*  
492 *Academy of Sciences* 117: 9451–9457. <https://doi.org/10.1073/pnas.1921046117>
- 493 Galang K. C., J. R. Croft, G. J. Thompson, and A. Percival-Smith, 2019 Analysis of the  
494 *Drosophila melanogaster* anti-ovarian response to honey bee queen mandibular pheromone.  
495 *Insect Molecular Biology* 28: 99–111. <https://doi.org/10.1111/imb.12531>
- 496 Gilbert C., S. Schaack, J. K. Pace, P. J. Brindley, and C. Feschotte, 2010 A role for host-parasite  
497 interactions in the horizontal transfer of transposons across phyla. *Nature* 464: 1347–50.  
498 <https://doi.org/10.1038/nature08939>
- 499 Gilbert J. D. J., L. A. Mound, and S. J. Simpson, 2012 Biology of a new species of socially  
500 parasitic thrips (Thysanoptera: Phlaeothripidae) inside *Dunatothrips* nests, with evolutionary

501 implications for inquilinism in thrips. *Biological Journal of the Linnean Society* 107: 112–122.  
502 <https://doi.org/10.1111/j.1095-8312.2012.01928.x>

503 Goldman-Huertas B., R. F. Mitchell, R. T. Lapoint, C. P. Faucher, J. G. Hildebrand, *et al.*, 2015  
504 Evolution of herbivory in Drosophilidae linked to loss of behaviors, antennal responses, odorant  
505 receptors, and ancestral diet. *PNAS* 112: 3026–3031. <https://doi.org/10.1073/pnas.1424656112>

506 Grimaldi D., and B. A. Underwood, 1986 *Megabraula*, a new genus for two new species of  
507 Braulidae (Diptera), and a discussion of braulid evolution. *Systematic Entomology* 11: 427–  
508 438. <https://doi.org/10.1111/j.1365-3113.1986.tb00534.x>

509 Ha T. S., and D. P. Smith, 2006 A Pheromone Receptor Mediates 11-cis-Vaccenyl Acetate-  
510 Induced Responses in *Drosophila*. *Journal of Neuroscience* 26: 8727–8733.  
511 <https://doi.org/10.1523/JNEUROSCI.0876-06.2006>

512 Hegner R. W., 1926 The Biology of Host-Parasite Relationships Among Protozoa Living in  
513 Man. *The Quarterly Review of Biology* 1: 393–418.

514 Hill T., B. S. Koseva, and R. L. Unckless, 2019 The Genome of *Drosophila innubila* Reveals  
515 Lineage-Specific Patterns of Selection in Immune Genes. *Molecular Biology and Evolution* 36:  
516 1405–1417. <https://doi.org/10.1093/molbev/msz059>

517 Huang M. H., and A. Dornhaus, 2008 A meta-analysis of ant social parasitism: host  
518 characteristics of different parasitism types and a test of Emery’s rule. *Ecological Entomology*  
519 33: 589–596. <https://doi.org/10.1111/j.1365-2311.2008.01005.x>

520 Imms A. D., 1942 On *Braula coeca* Nitsch and its affinities. *Parasitology* 34: 88–100.  
521 <https://doi.org/10.1017/S0031182000016012>

522 Jansen G., R. Savolainen, and K. Vepsäläinen, 2010 Phylogeny, divergence-time estimation,  
523 biogeography and social parasite–host relationships of the Holarctic ant genus *Myrmica*  
524 (Hymenoptera: Formicidae). *Molecular Phylogenetics and Evolution* 56: 294–304.  
525 <https://doi.org/10.1016/j.ympev.2010.01.029>

526 Jones W. D., P. Cayirlioglu, I. Grunwald Kadow, and L. B. Vosshall, 2007 Two chemosensory  
527 receptors together mediate carbon dioxide detection in *Drosophila*. *Nature* 445: 86–90.  
528 <https://doi.org/10.1038/nature05466>

529 Kaschef A.-H., 1959 The sensory physiology and behaviour of the Honeybee Louse *Braula*  
530 *coeca* Nitzsch (Diptera, Braulidae). *Ins. Soc* 6: 313–342. <https://doi.org/10.1007/BF02225778>

531 Kelley J. L., J. T. Peyton, A.-S. Fiston-Lavier, N. M. Teets, M.-C. Yee, *et al.*, 2014 Compact  
532 genome of the Antarctic midge is likely an adaptation to an extreme environment. *Nat Commun*  
533 5: 4611. <https://doi.org/10.1038/ncomms5611>

534 Kim B. Y., J. R. Wang, D. E. Miller, O. Barmina, E. Delaney, *et al.*, 2021 Highly contiguous

535 assemblies of 101 drosophilid genomes, (G. Coop, P. J. Wittkopp, and T. B. Sackton, Eds.).  
536 eLife 10: e66405. <https://doi.org/10.7554/eLife.66405>

537 Kirkness E. F., B. J. Haas, W. Sun, H. R. Braig, M. A. Perotti, *et al.*, 2010 Genome sequences  
538 of the human body louse and its primary endosymbiont provide insights into the permanent  
539 parasitic lifestyle. *Proceedings of the National Academy of Sciences* 107: 12168–12173.  
540 <https://doi.org/10.1073/pnas.1003379107>

541 Kneitel J. M., and T. E. Miller, 2002 Resource and Top-Predator Regulation in the Pitcher Plant  
542 (*sarracenia Purpurea*) Inquiline Community. *Ecology* 83: 680–688.  
543 [https://doi.org/10.1890/0012-9658\(2002\)083\[0680:RATPRI\]2.0.CO;2](https://doi.org/10.1890/0012-9658(2002)083[0680:RATPRI]2.0.CO;2)

544 Kokot M., M. Długosz, and S. Deorowicz, 2017 KMC 3: counting and manipulating k-mer  
545 statistics. *Bioinformatics* 33: 2759–2761. <https://doi.org/10.1093/bioinformatics/btx304>

546 König S., L. W. Romoth, L. Gerischer, and M. Stanke, 2016 Simultaneous gene finding in  
547 multiple genomes. *Bioinformatics* 32: 3388–3395.  
548 <https://doi.org/10.1093/bioinformatics/btw494>

549 Korf I., 2004 Gene finding in novel genomes. *BMC Bioinformatics* 5: 59.  
550 <https://doi.org/10.1186/1471-2105-5-59>

551 Kumar S., G. Stecher, M. Li, C. Knyaz, and K. Tamura, 2018 MEGA X: Molecular  
552 Evolutionary Genetics Analysis across Computing Platforms. *Molecular Biology and Evolution*  
553 35: 1547–1549. <https://doi.org/10.1093/molbev/msy096>

554 Kurstjens S. P., H. R. Hepburn, F. R. L. Schoening, and B. C. Davidson, 1985 The conversion  
555 of wax scales into comb wax by African honeybees. *J Comp Physiol B* 156: 95–102.  
556 <https://doi.org/10.1007/BF00692930>

557 Kurtovic A., A. Widmer, and B. J. Dickson, 2007 A single class of olfactory neurons mediates  
558 behavioural responses to a *Drosophila* sex pheromone. *Nature* 446: 542–546.  
559 <https://doi.org/10.1038/nature05672>

560 Lacaille F., M. Hiroi, R. Twele, T. Inoshita, D. Umemoto, *et al.*, 2007 An Inhibitory Sex  
561 Pheromone Tastes Bitter for *Drosophila* Males. *PLOS ONE* 2: e661.  
562 <https://doi.org/10.1371/journal.pone.0000661>

563 Laetsch D. R., and M. L. Blaxter, 2017 BlobTools: Interrogation of genome assemblies

564 Landman N. H., R. H. B. Lraaije, S. M. Klofak, N. L. Larson, G. A. Bishop, *et al.*, 2014  
565 Inquilinism of a Baculite by a Dynomenid Crab from the Upper Cretaceous of South Dakota.  
566 *novi* 2014: 1–16. <https://doi.org/10.1206/3818.1>

567 Letunic I., and P. Bork, 2019 Interactive Tree Of Life (iTOL) v4: recent updates and new  
568 developments. *Nucleic Acids Research* 47: W256–W259. <https://doi.org/10.1093/nar/gkz239>

- 569 Leung N. Y., and C. Montell, 2017 Unconventional Roles of Opsins. *Annu. Rev. Cell Dev.*  
570 *Biol.* 33: 241–264. <https://doi.org/10.1146/annurev-cellbio-100616-060432>
- 571 Leung N. Y., D. P. Thakur, A. S. Gurav, S. H. Kim, A. Di Pizio, *et al.*, 2020 Functions of  
572 Opsins in *Drosophila* Taste. *Current Biology* 30: 1367-1379.e6.  
573 <https://doi.org/10.1016/j.cub.2020.01.068>
- 574 Li H., 2018 Minimap2: pairwise alignment for nucleotide sequences. *Bioinformatics* 34: 3094–  
575 3100. <https://doi.org/10.1093/bioinformatics/bty191>
- 576 Lopez-Osorio F., A. Perrard, K. M. Pickett, J. M. Carpenter, and I. Agnarsson, 2015  
577 Phylogenetic tests reject Emery’s rule in the evolution of social parasitism in yellowjackets and  
578 hornets (Hymenoptera: Vespidae, Vespinae). *Royal Society Open Science* 2: 150159.  
579 <https://doi.org/10.1098/rsos.150159>
- 580 Lu H., F. Giordano, and Z. Ning, 2016 Oxford Nanopore MinION Sequencing and Genome  
581 Assembly. *Genomics, Proteomics & Bioinformatics* 14: 265–279.  
582 <https://doi.org/10.1016/j.gpb.2016.05.004>
- 583 Luczkovich J. J., G. M. Watters, and B. L. Olla, 1991 Seasonal Variation in Usage of a Common  
584 Shelter Resource by Juvenile Inquiline Snailfish (*Liparis inquilinus*) and Red Hake (*Urophycis*  
585 *chuss*). *Copeia* 1991: 1104–1109. <https://doi.org/10.2307/1446107>
- 586 Machado A. M., M. G. Miguel, M. Vilas-Boas, and A. C. Figueiredo, 2020 Honey Volatiles as  
587 a Fingerprint for Botanical Origin—A Review on their Occurrence on Monofloral Honeys.  
588 *Molecules* 25: 374. <https://doi.org/10.3390/molecules25020374>
- 589 Mai D., M. J. Nalley, and D. Bachtrog, 2020 Patterns of Genomic Differentiation in the  
590 *Drosophila nasuta* Species Complex. *Molecular Biology and Evolution* 37: 208–220.  
591 <https://doi.org/10.1093/molbev/msz215>
- 592 Martin S. J., and J. Bayfield, 2014 Is the bee louse *Braula coeca* (Diptera) using chemical  
593 camouflage to survive within honeybee colonies? *Chemoecology* 24: 165–169.  
594 <https://doi.org/10.1007/s00049-014-0158-1>
- 595 Matsunaga T., C. E. Reisenman, B. Goldman-Huertas, P. Brand, K. Miao, *et al.*, 2022 Evolution  
596 of Olfactory Receptors Tuned to Mustard Oils in Herbivorous *Drosophilidae*. *Molecular*  
597 *Biology and Evolution* 39: msab362. <https://doi.org/10.1093/molbev/msab362>
- 598 Mishra A. K., C. Fritsch, R. Voutev, R. S. Mann, and S. G. Sprecher, 2021 *Homothorax* controls  
599 a binary Rhodopsin switch in *Drosophila* ocelli. *PLOS Genetics* 17: e1009460.  
600 <https://doi.org/10.1371/journal.pgen.1009460>
- 601 Misof B., S. Liu, K. Meusemann, R. S. Peters, A. Donath, *et al.*, 2014 Phylogenomics resolves  
602 the timing and pattern of insect evolution. *Science* 346: 763–767.

- 603 <https://doi.org/10.1126/science.1257570>
- 604 Moon S. J., Y. Lee, Y. Jiao, and C. Montell, 2009 A *Drosophila* Gustatory Receptor Essential  
605 for Aversive Taste and Inhibiting Male-to-Male Courtship. *Current Biology* 19: 1623–1627.  
606 <https://doi.org/10.1016/j.cub.2009.07.061>
- 607 Moser J. C., 1964 Inquiline Roach Responds to Trail-Marking Substance of Leaf-Cutting Ants.  
608 *Science* 143: 1048–1049. <https://doi.org/10.1126/science.143.3610.1048>
- 609 Müggenburg F. H., 1892 *Der Rüssel der Diptera pupipara*. Nicolai.
- 610 Muller H., D. Ogereau, J.-L. Da Lage, C. Capdevielle, N. Pollet, *et al.*, 2021 Draft nuclear  
611 genome and complete mitogenome of the Mediterranean corn borer, *Sesamia nonagrioides*, a  
612 major pest of maize. *G3 Genes|Genomes|Genetics* 11: jkab155.  
613 <https://doi.org/10.1093/g3journal/jkab155>
- 614 Münch D., and C. G. Galizia, 2016 DoOR 2.0 - Comprehensive Mapping of *Drosophila*  
615 *melanogaster* Odorant Responses. *Scientific Reports* 6: 21841.  
616 <https://doi.org/10.1038/srep21841>
- 617 Ni J. D., L. S. Baik, T. C. Holmes, and C. Montell, 2017 A rhodopsin in the brain functions in  
618 circadian photoentrainment in *Drosophila*. *Nature* 545: 340–344.  
619 <https://doi.org/10.1038/nature22325>
- 620 Ortiz M. F., G. L. Wallau, D. A. Graichen, and E. L. Loreto, 2015 An evaluation of the  
621 ecological relationship between *Drosophila* species and their parasitoid wasps as an opportunity  
622 for horizontal transposon transfer. *Molecular Genetics and Genomics* 290: 67–78.  
623 <https://doi.org/10.1007/s00438-014-0900-y>
- 624 Partha R., B. K. Chauhan, Z. Ferreira, J. D. Robinson, K. Lathrop, *et al.*, 2017 Subterranean  
625 mammals show convergent regression in ocular genes and enhancers, along with adaptation to  
626 tunneling, (D. T. Odom, Ed.). *eLife* 6: e25884. <https://doi.org/10.7554/eLife.25884>
- 627 Policarpo M., J. Fumey, P. Lafargeas, D. Naquin, C. Thermes, *et al.*, 2021 Contrasting Gene  
628 Decay in Subterranean Vertebrates: Insights from Cavefishes and Fossorial Mammals.  
629 *Molecular Biology and Evolution* 38: 589–605. <https://doi.org/10.1093/molbev/msaa249>
- 630 Ranallo-Benavidez T. R., K. S. Jaron, and M. C. Schatz, 2020 GenomeScope 2.0 and  
631 Smudgeplot for reference-free profiling of polyploid genomes. *Nat Commun* 11: 1432.  
632 <https://doi.org/10.1038/s41467-020-14998-3>
- 633 Robertson H. M., and K. W. Wanner, 2006 The chemoreceptor superfamily in the honey bee,  
634 *Apis mellifera*: Expansion of the odorant, but not gustatory, receptor family. *Genome Res.* 16:  
635 1395–1403. <https://doi.org/10.1101/gr.5057506>
- 636 Roff D. A., 1990 The Evolution of Flightlessness in Insects. *Ecological Monographs* 60: 389–

- 637 421. <https://doi.org/10.2307/1943013>
- 638 Rogers H. H., and S. Griffiths-Jones, 2012 Mitochondrial Pseudogenes in the Nuclear Genomes  
639 of *Drosophila*. PLOS ONE 7: e32593. <https://doi.org/10.1371/journal.pone.0032593>
- 640 Romiguier J., J. Rolland, C. Morandin, and L. Keller, 2018 Phylogenomics of palearctic  
641 *Formica* species suggests a single origin of temporary parasitism and gives insights to the  
642 evolutionary pathway toward slave-making behaviour. BMC Evolutionary Biology 18: 40.  
643 <https://doi.org/10.1186/s12862-018-1159-4>
- 644 Ronquist F., 1994 Evolution of Parasitism Among Closely Related Species: Phylogenetic  
645 Relationships and the Origin of Inquilinism in Gall Wasps (hymenoptera, Cynipidae).  
646 Evolution 48: 241–266. <https://doi.org/10.1111/j.1558-5646.1994.tb01310.x>
- 647 Sanver D., and B. A. Hawkins, 2000 Galls as habitats: the inquiline communities of insect galls.  
648 Basic and Applied Ecology 1: 3–11. <https://doi.org/10.1078/1439-1791-00001>
- 649 Savolainen R., and K. Vepsäläinen, 2003 Sympatric speciation through intraspecific social  
650 parasitism. Proceedings of the National Academy of Sciences 100: 7169–7174.  
651 <https://doi.org/10.1073/pnas.1036825100>
- 652 Scanlan J. L., R. S. Gledhill-Smith, P. Battlay, and C. Robin, 2020 Genomic and transcriptomic  
653 analyses in *Drosophila* suggest that the ecdysteroid kinase-like (EckL) gene family encodes  
654 the ‘detoxification-by-phosphorylation’ enzymes of insects. Insect Biochemistry and Molecular  
655 Biology 123: 103429. <https://doi.org/10.1016/j.ibmb.2020.103429>
- 656 Schrader L., H. Pan, M. Bollazzi, M. Schjøtt, F. J. Larabee, *et al.*, 2021 Relaxed selection  
657 underlies genome erosion in socially parasitic ant species. Nat Commun 12: 2918.  
658 <https://doi.org/10.1038/s41467-021-23178-w>
- 659 Seeley T. D., 1974 Atmospheric carbon dioxide regulation in honey-bee (*Apis mellifera*)  
660 colonies. Journal of Insect Physiology 20: 2301–2305. [https://doi.org/10.1016/0022-1910\(74\)90052-3](https://doi.org/10.1016/0022-1910(74)90052-3)
- 662 Senthilan P. R., and C. Helfrich-Förster, 2016 Rhodopsin 7–The unusual Rhodopsin in  
663 *Drosophila*. PeerJ 4: e2427. <https://doi.org/10.7717/peerj.2427>
- 664 Sherman B. T., M. Hao, J. Qiu, X. Jiao, M. W. Baseler, *et al.*, 2022 DAVID: a web server for  
665 functional enrichment analysis and functional annotation of gene lists (2021 update). Nucleic  
666 Acids Research 50: W216–W221. <https://doi.org/10.1093/nar/gkac194>
- 667 Skaife S. H., 1922 On *Braula Coeca*, Nitzsch, a Dipterous parasite of the honey bee.  
668 Transactions of the Royal Society of South Africa 10: 41–48.  
669 <https://doi.org/10.1080/00359192209519263>
- 670 Stange G., and M. Diesendorf, 1973 The response of the honeybee antennal CO<sub>2</sub>-receptors to



671 N<sub>2</sub>O and Xe. *J. Comp. Physiol.* 86: 139–158. <https://doi.org/10.1007/BF00702534>

672 Starowicz M., P. Hanus, G. Lamparski, and T. Sawicki, 2021 Characterizing the Volatile and  
673 Sensory Profiles, and Sugar Content of Beeswax, Beebread, Bee Pollen, and Honey. *Molecules*  
674 26: 3410. <https://doi.org/10.3390/molecules26113410>

675 Suvorov A., B. Y. Kim, J. Wang, E. E. Armstrong, D. Peede, *et al.*, 2021 Widespread  
676 introgression across a phylogeny of 155 *Drosophila* genomes. *Current Biology* 0.  
677 <https://doi.org/10.1016/j.cub.2021.10.052>

678 Torto B., D. G. Boucias, R. T. Arbogast, J. H. Tumlinson, and P. E. A. Teal, 2007 Multitrophic  
679 interaction facilitates parasite–host relationship between an invasive beetle and the honey bee.  
680 *Proceedings of the National Academy of Sciences* 104: 8374–8378.  
681 <https://doi.org/10.1073/pnas.0702813104>

682 Venner S., V. Miele, C. Terzian, C. Biémont, V. Daubin, *et al.*, 2017 Ecological networks to  
683 unravel the routes to horizontal transposon transfers. *PLOS Biology* 15: e2001536.  
684 <https://doi.org/10.1371/journal.pbio.2001536>

685 Weinstock G. M., G. E. Robinson, R. A. Gibbs, G. M. Weinstock, G. M. Weinstock, *et al.*,  
686 2006 Insights into social insects from the genome of the honeybee *Apis mellifera*. *Nature* 443:  
687 931–949. <https://doi.org/10.1038/nature05260>

688 Weiss L. A., A. Dahanukar, J. Y. Kwon, D. Banerjee, and J. R. Carlson, 2011 The Molecular  
689 and Cellular Basis of Bitter Taste in *Drosophila*. *Neuron* 69: 258–272.  
690 <https://doi.org/10.1016/j.neuron.2011.01.001>

691 Winkler I. S., A. H. Kirk-Spriggs, K. M. Bayless, J. Soghigian, R. Meier, *et al.*, 2022  
692 Phylogenetic resolution of the fly superfamily Ephydroidea–Molecular systematics of the  
693 enigmatic and diverse relatives of Drosophilidae. *PLOS ONE* 17: e0274292.  
694 <https://doi.org/10.1371/journal.pone.0274292>

695 Winston M. L., 1987 *The Biology of the Honey Bee*. Harvard University Press.

696 Yassin A., 2013 Phylogenetic classification of the Drosophilidae Rondani (Diptera): the role of  
697 morphology in the postgenomic era. *Systematic Entomology* 38: 349–364.

698 Zanini D., D. Giraldo, B. Warren, R. Katana, M. Andrés, *et al.*, 2018 Proprioceptive Opsin  
699 Functions in *Drosophila* Larval Locomotion. *Neuron* 98: 67–74.e4.  
700 <https://doi.org/10.1016/j.neuron.2018.02.028>

701 Zhang H.-H., J. Peccoud, M.-R.-X. Xu, X.-G. Zhang, and C. Gilbert, 2020 Horizontal transfer  
702 and evolution of transposable elements in vertebrates. *Nat Commun* 11: 1362.  
703 <https://doi.org/10.1038/s41467-020-15149-4>

704 Zimin A. V., D. Puiu, M.-C. Luo, T. Zhu, S. Koren, *et al.*, 2017 Hybrid assembly of the large



705 and highly repetitive genome of *Aegilops tauschii*, a progenitor of bread wheat, with the  
706 MaSuRCA mega-reads algorithm. *Genome Res.* 27: 787–792.  
707 <https://doi.org/10.1101/gr.213405.116>  
708

709 **Legends of figures**

710

711 **Figure 1** – The bee louse fly (*Braula coeca*) morphology and genome. A) Two adults  
712 attached to a honey bee worker preserved in alcohol. B) Dorsal view of an adult showing  
713 the loss of the wings, halteres and scutum, the reduction of the mesonotum and the  
714 robustness of the legs. C) Frontal view of an adult showing the reduction of the eyes and  
715 the loss of the ocelli. Scale bars = 1 mm in A and 0.5 mm in B and C. D) Orthologous genes  
716 colocalization in *D. melanogaster* Muller's elements and *B. coeca* contigs demonstrating  
717 the predominant conservation of synteny. E) The mitochondrial genome of *B. coeca*. Blue  
718 and violet ribbons indicate the protein-encoding genes in sens and anti-sens respectively,  
719 red and yellow ribbons indicate the rRNA and tRNA genes in sens and anti-sens  
720 respectively. Names with asterix indicate the presence of inactivated paralogous genes.

721

722 **Figure 2** – Maximum-likelihood phylogenetic tree for A) odorant receptors (ORs) and B)  
723 gustatory receptors (GRs) of *A. mellifera* (green), *B. coeca* (red) and *D. melanogaster*  
724 (blue). Genes commented in the text are labelled. For full labels see Supplementary  
725 Figures 4 and 5. Sequences for *B. coeca* are given in Supplementary Datasets 2 and 3 for  
726 ORs and GRs, respectively. Sequences for *A. mellifera* and *D. melanogaster* are from  
727 Robertson and Wanner (2006). a.a. = amino acids.

728

729

730 **List of supplementary materials**

731

732 **Supplementary Dataset 1** – Sequence of all *Famar* and *Famar1*-like copies used to  
733 reconstruct the phylogeny shown in Supplementary Figure 3. The sequence names  
734 contain the name of the species, the Genbank accession number of the contig from which  
735 the copy was extracted, the start and end position of the copy in the contig, as well as a  
736 final number that allows making a correspondence with leaves in the tree shown in  
737 Supplementary Figure 3.

738

739 **Supplementary Dataset 2** – Sequence of odorant receptors (ORs) of *Braula coeca* used  
740 to reconstruct the phylogeny shown in Supplementary Figure 4.

741

742 **Supplementary Dataset 3** – Sequence of gustatory receptors (GRs) of *Braula coeca* used  
743 to reconstruct the phylogeny shown in Supplementary Figure 5.

744

745 **Supplementary Figure 1** – Genomic features of *Braula coeca*. A) Ploidy estimation using  
746 the coverage and the distribution of heterozygous k-mers pairs. B) Genome size  
747 estimation using the k-mer profile spectrum. C) Taxonomic assignation of the contigs  
748 according to their GC% and their coverages. D) Proportion of short-reads that mapped  
749 onto the genome assembly (left) and onto the different contigs according to their  
750 taxonomic assignments (right).

751

752 **Supplementary Figure 2** – Comparison of *Famar1*-like synonymous distance and  
753 orthologous gene synonymous distances between *Braula coeca* and *Apis mellifera*. To  
754 calculate the distribution of gene or gene fragment synonymous distances (dS) between  
755 *B. coeca* and *A. mellifera* we selected best reciprocal blastp hits between single copy  
756 BUSCO genes retrieved from the two species and calculated dS for each of them using the  
757 approach described in Zhang *et al.* (2020). The red line indicates the 0.5% quantile of this  
758 distribution (=1.76). The distribution is bimodal, with genes having highly saturated dS  
759 values showing a peak centered on 9.99 and genes showing less saturated dS values  
760 showing another peak around 2.5. We verified that genes showing less saturated values  
761 correspond to highly genes that evolve under strong purifying selection and are thus  
762 highly conserved between Hymenoptera and Diptera. The *Famar1*-like dS (green line, =

763 0.12) was calculated over the transposase open reading from of one copy of the element  
764 extracted from the *A. mellifera* genome and another copy extracted from the *B. coeca*  
765 genome.

766

767 **Supplementary Figure 3** – Phylogeny of *Famar1*-like copies from 38 animal species. The  
768 ten *Famar1*-like copies showing the highest nucleotide identity to the *Famar* element  
769 initially described in the earwig (Barry *et al.* 2004b) were retrieved using online blastn  
770 (see Supplementary Text 1) and extracted from the genome of 37 animal species. Filled  
771 circles indicate bootstrap value higher than 70%, with the diameter of the circle  
772 proportional to each individual value. Name of the copies are composed of the name of  
773 the species from which they were extracted and a unique number that allows making a  
774 correspondence with sequences provided in Supplementary Dataset 1.

775

776 **Supplementary Figure 4** – Labelled maximum-likelihood phylogeny of odorant  
777 receptors (ORs) of *A. mellifera* (green), *B. coeca* (blue), and *D. melanogaster* (red) show in  
778 Figure 2A.

779

780 **Supplementary Figure 5** – Labelled maximum-likelihood phylogeny of gustatory  
781 receptors (GRs) of *A. mellifera* (green), *B. coeca* (blue), and *D. melanogaster* (red) show in  
782 Figure 2B.

783

784 **Supplementary Table 1** – Proportions of transposable elements in the genomes of *B.*  
785 *coeca*, *D. melanogaster* and *A. mellifera*.

786

787 **Supplementary Table 2** – Gene Ontology (GO) enrichment for *D. melanogaster* genes that  
788 are absent from *B. coeca* genome as inferred using DAVID 2021.

789

790 **Supplementary Table 3** – Gene Ontology (GO) enrichment for *D. melanogaster* genes that  
791 have additional copies in *B. coeca* genome as inferred using DAVID 2021.

792

793 **Supplementary Text 1** – Analysis of horizontal transfer of transposable elements  
794 between *B. coeca* and *A. mellifera*.

795

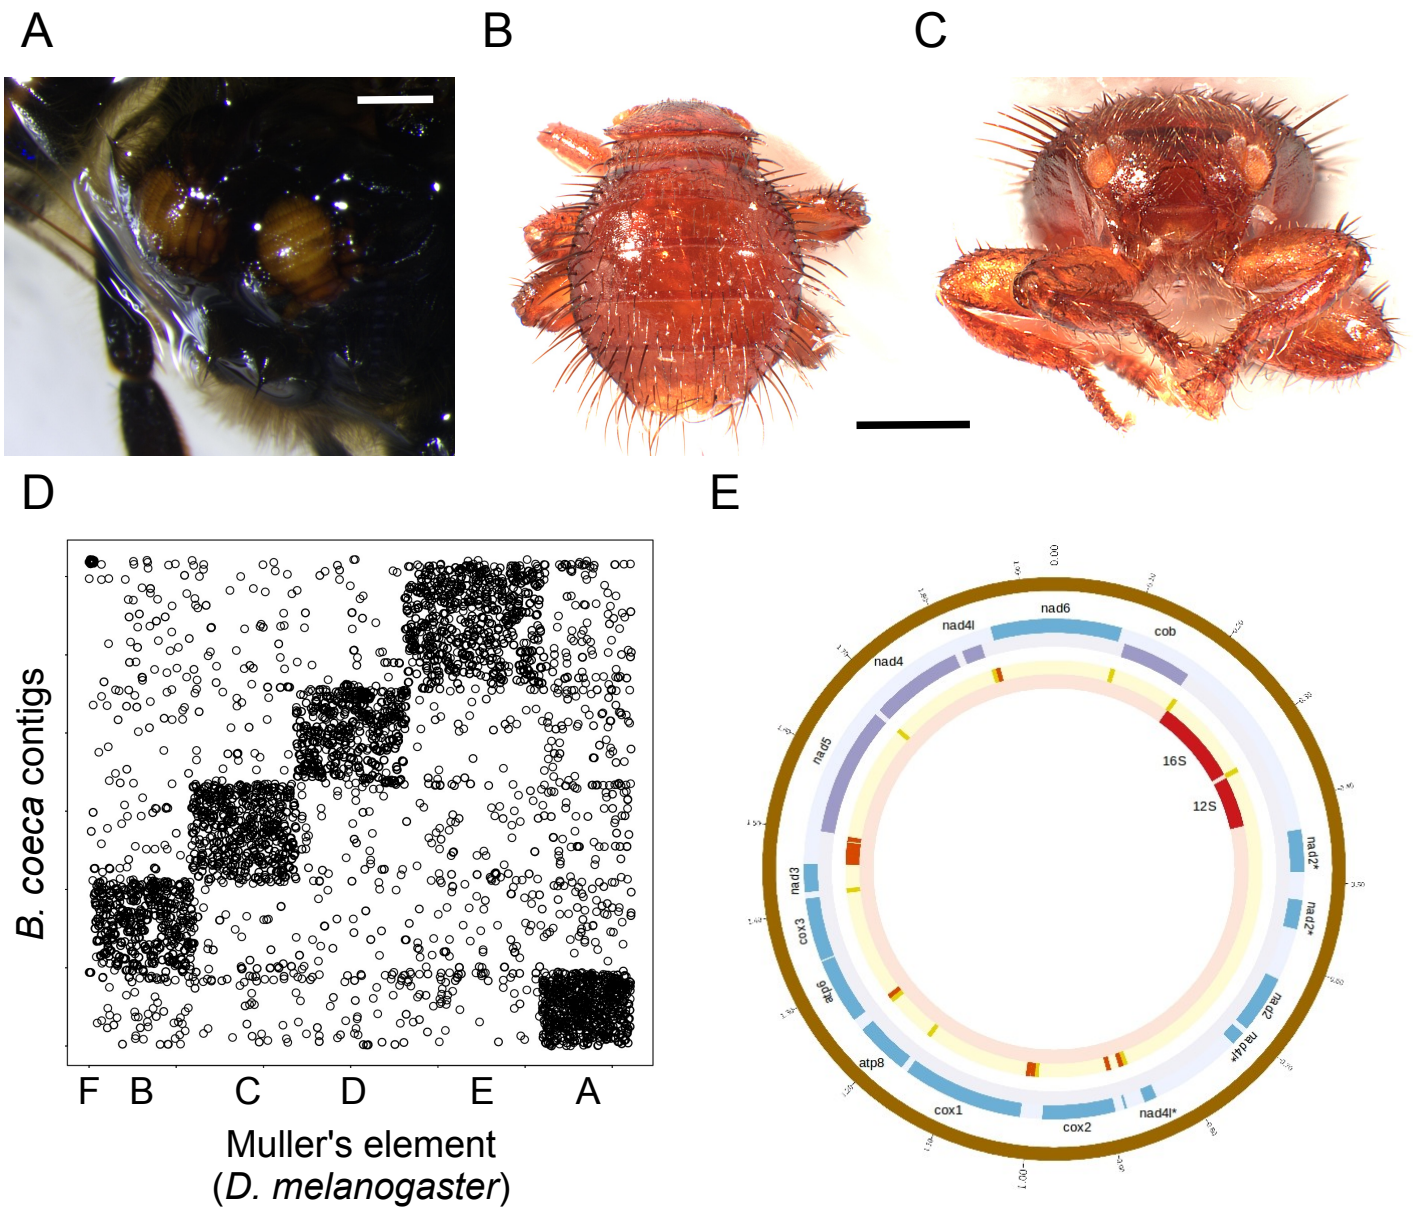

A

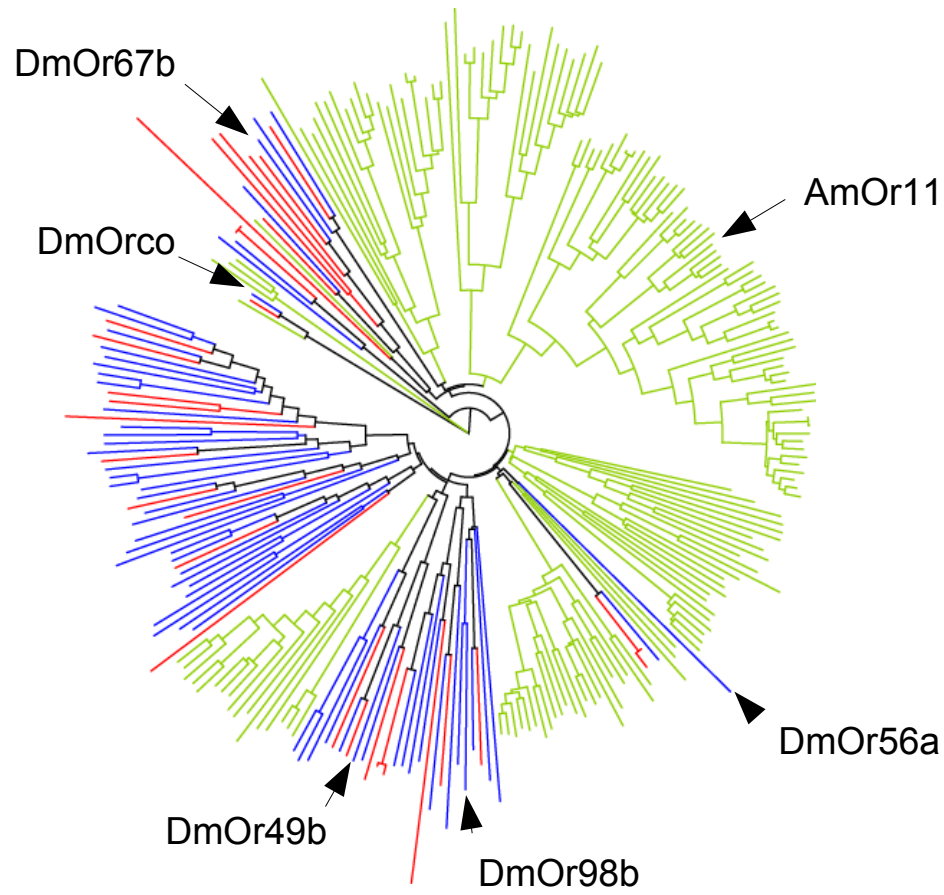

B

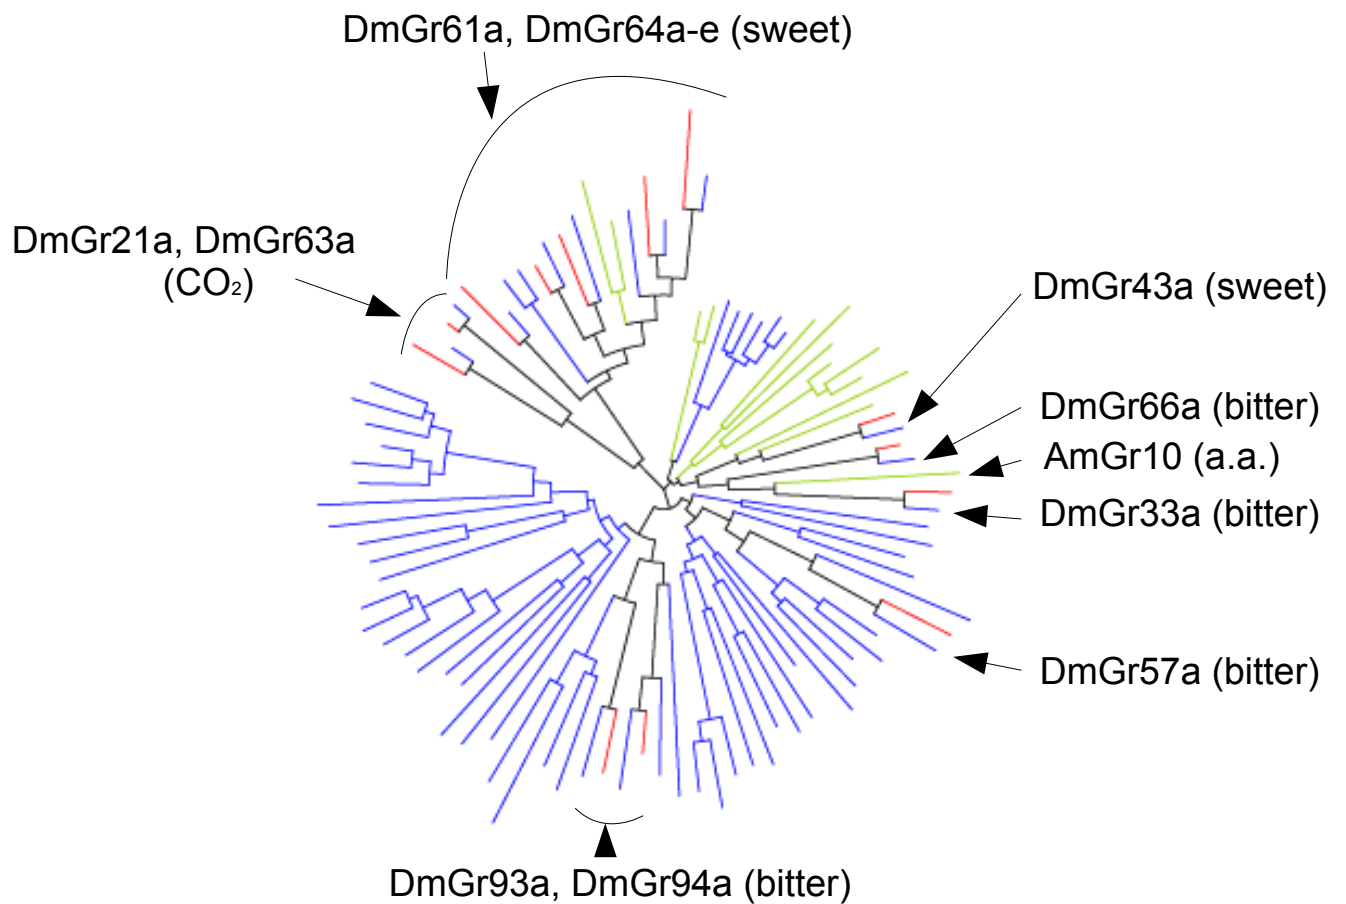

Source: https://www.biorxiv.org/content/biorxiv/early/2022/11/10/2022.11.08.515706.full.pdf
